# Supplementary material
Source: PubMed Central journal article supplement (PMC6001710)
Supplement: AET2-1-75-s001.pdf [file AET2-1-75-s001.pdf]

Data Supplement S1: Faculty Survey Predicting Resident Burnout

**Please refer to the provided definition of burnout in the following question.**

Burnout is a syndrome of (1) emotional exhaustion; (2) depersonalization; and (3) reduced personal accomplishment.

- 1) Emotional exhaustion: feeling no longer able to give of oneself at a psychological level
- 2) Depersonalization: negative, cynical attitudes and feelings about one's patients
- 3) Reduced personal accomplishment: tendency to evaluate oneself negatively, particularly with regard to patient care

**In your overall experience working with the following resident, XXX, does he/she exhibit signs of burnout?**

- Yes
- No
- Not enough time with the resident to determine

**Demographics**

**Gender:**

- Male
- Female

**Number of years in practice since completion of residency: \_\_\_\_\_**

**Average number of clinical hours worked per month: \_\_\_\_\_**
